# Supplementary material for: Melamine-induced formation of carbon nanotubes assembly on metal–organic framework-derived Co/C composites for lightweight and broadband microwave absorption
Source: Royal Society of Chemistry journal article supplement (doi:10.1039/d1dt00655j), 2021-01-01
Supplement: d1dt00655j1.pdf [file d1dt00655j1.pdf]

## Supporting Information

# Melamine-induced formation of carbon nanotubes assembly on metal-organic framework-derived Co/C composites for lightweight and broadband microwave absorption

Wei Liu,<sup>abc</sup> Pengtao Duan,<sup>ab</sup> Chao Mei,<sup>ab</sup> Kun Wan,<sup>ab</sup> Bawei Zhang,<sup>abc</sup> Hailin Su,<sup>\*abcd</sup>  
Xuebin Zhang,<sup>\*abc</sup>, Jinzhi Wang,<sup>\*d</sup> and Zhongqiu Zou<sup>b,c</sup>

a School of Materials Science and Engineering and Anhui Provincial Key Laboratory  
of Advanced Functional Materials and Devices, Hefei University of Technology, Hefei,  
230009, China

b Huaian Engineering Research Center of Soft Magnetic Powder Cores and Devices,  
Jiangsu Red Magnetic Materials Incorporation, Huaian, 211700, China

c Anhui Red Magneto-electric Technology Co., Ltd., Wuhu, 241002, China

d School of Materials and Chemistry Engineering, Ningbo University of Technology,  
Ningbo, 315211, China

### Corresponding Author

Email: hailinsu@hfut.edu.cn; zzhxhxbb@126.com; wangjz@nbut.edu.cn

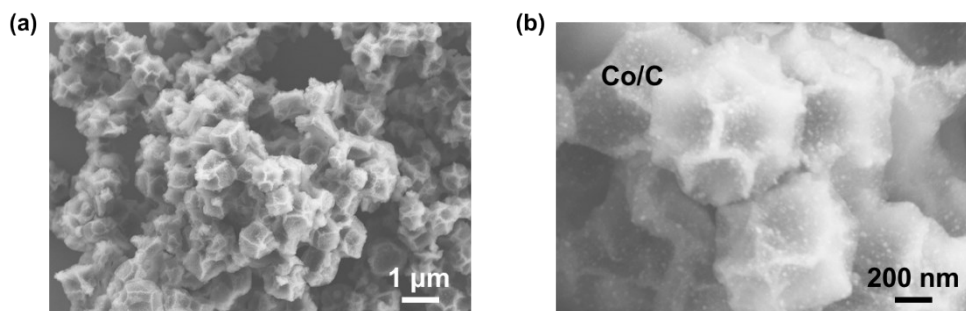

**Fig. S1** SEM images of Co/C nanoparticles derived from ZIF-67.

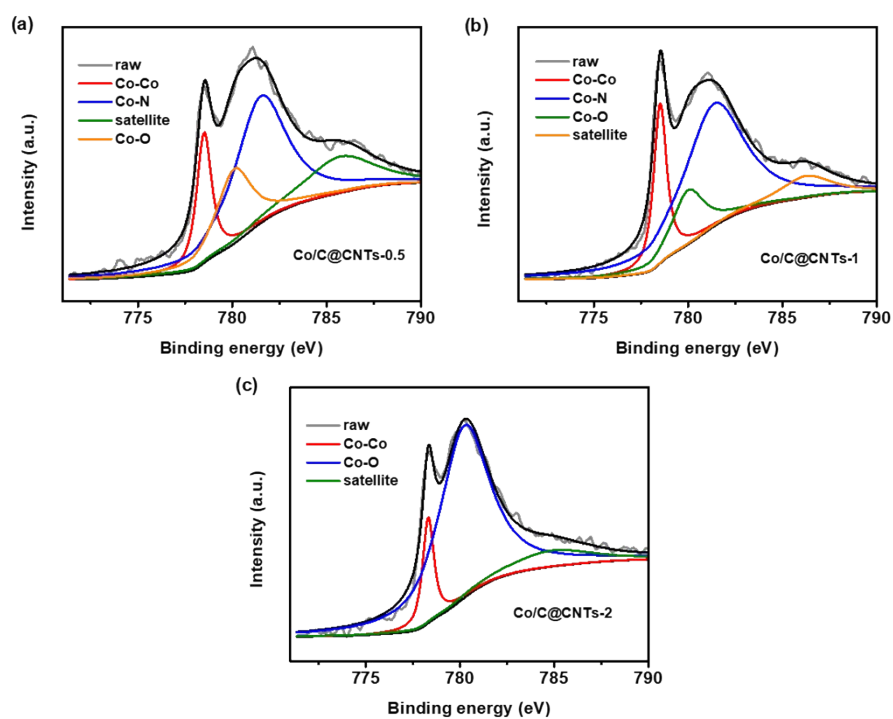

**Fig. S2** High resolution Co 2p XPS spectra of (a) Co/C@CNTs-0.5, (b) Co/C@CNTs-1 and (c) Co/C@CNTs-2.

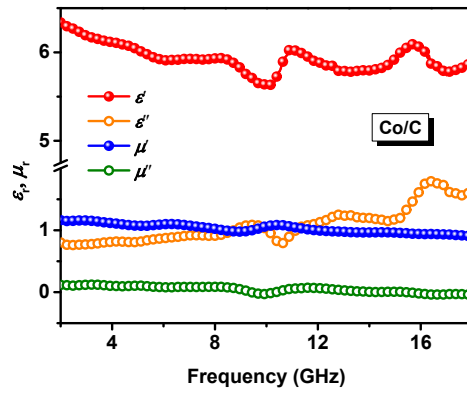

**Fig. S3** Complex permittivity and permeability spectra of Co/C composites.

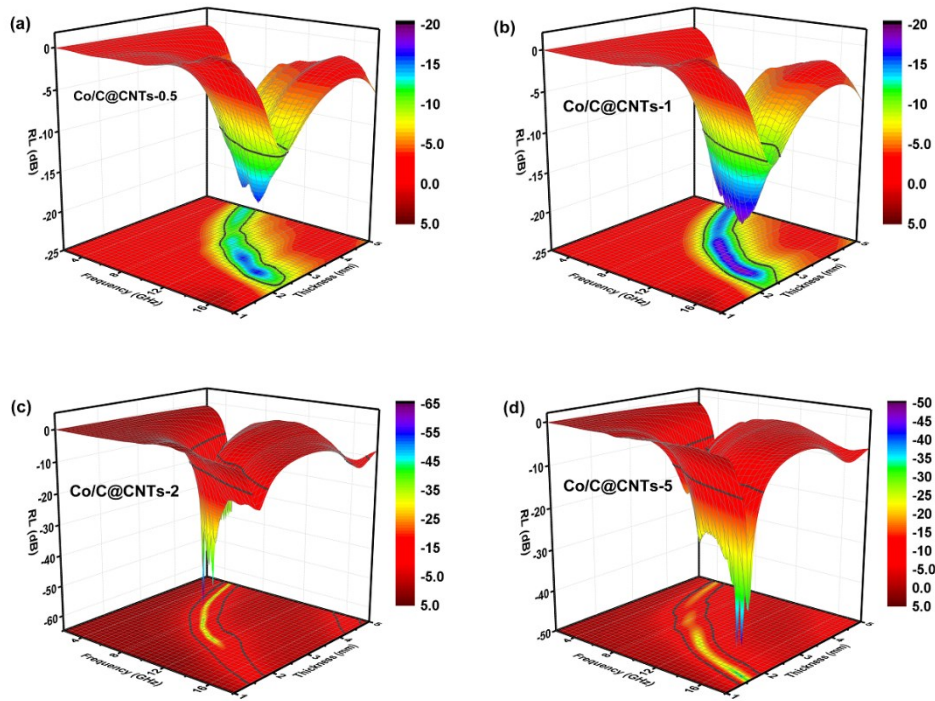

**Fig. S4** 3D reflection loss graphs of (a) Co/C@CNTs-0.5, (b) Co/C@CNTs-1, (c) Co/C@CNTs-2 and (d) Co/C@CNTs-5.

**Table S1** Comparison of microwave absorption performance of similar microwave absorbing materials

| <b>samples</b>                                               | <b>filling<br/>ratio<br/>(wt%)</b> | <b>thickness<br/>(mm)</b> | <b>RL<br/>(dB)</b> | <b>EAB<br/>(GHz)</b> | <b>Ref.</b> |
|--------------------------------------------------------------|------------------------------------|---------------------------|--------------------|----------------------|-------------|
| Fe <sub>3</sub> N@C                                          | 65                                 | 1.5                       | -31.8              | 6                    | 1           |
| CoS <sub>2</sub> /NCNTs                                      | 50                                 | 1.6                       | -65                | 4.2                  | 2           |
| NC@Co/NC carbon<br>nanocages                                 | 25                                 | 2.2                       | -52.5              | 4.4                  | 3           |
| F6                                                           | 40                                 | 3.07                      | -52.9              | 4.64                 | 4           |
| Fe <sub>3</sub> O <sub>4</sub> @N-doped carbon<br>nanochains | 20                                 | 3.1                       | -63.09             | 5.34                 | 5           |
| Mo <sub>2</sub> N@CoFe@C/CNT                                 | 20                                 | 2                         | -53.5              | 5.0                  | 6           |
| HPCNs-3                                                      | 25                                 | 1.6                       | -18.13             | 5.17                 | 7           |
| Fe@N-doped C                                                 | ~50                                | 2.1                       | -60.0              | 4.48                 | 8           |
| CN-Ce                                                        | 20                                 | 2.3                       | -50.36             | 3.83                 | 9           |
| ZnNiC                                                        | 50                                 | 1.6                       | -66.1              | 4.4                  | 10          |
| Co/N/C@MnO <sub>2</sub>                                      | 15                                 | 3.7                       | -58.9              | 5.5                  | 11          |
| Co/C@CNTs-2                                                  | 20                                 | 2.8                       | -45.13             | 4.4                  | this        |
| Co/C@CNTs-5                                                  | 20                                 | 1.9                       | -22.22             | 5.6                  | work        |

## References

- 1 X. Cui, X. Liang, W. Liu, W. Gu, G. Ji and Y. Du, *Chem. Eng. J.*, 2020, **381**, 122589.
- 2 J. Yan, Y. Huang, X. Han, X. Gao and P. Liu, *Compos. Part. B-Eng.*, 2019, **163**, 67-

76.

3 P. Liu, S. Gao, Y. Wang, Y. Huang, W. He, W. Huang, J. Luo, *Chem. Eng. J.*, 2020, **381**, 122653.

4 N. Wu, D. Xu, Z. Wang, F. Wang, J. Liu, W. Liu, Q. Shao, H. Liu, Q. Gao and Z. Guo, *Carbon*, 2019, **145**, 433-444.

5 M. Qiao, X. Lei, Y. Ma, L. Tian, X. He, K. Su and Q. Zhang, *Nano Res.*, 2018, **11**, 1500-1519.

6 C. Xu, L. Wang, X. Li, X. Qian, Z. Wu, W. You, K. Pei, G. Qin, Q. Zeng, Z. Yang, C. Jin and R. Che, *Nano-Micro Lett.*, 2021, **13**, 47.

7 J. Tao, J. Zhou, Z. Yao, Z. Jiao, B. Wei, R. Tan and Z. Li, *Carbon*, 2021, **172**, 542-555.

8 Q. Liu, M. Zeng, J. Liu, B. Guo, X. Hao, Q. Cao, Y. Shang, X. Sun, J. Liu, X. Gao, J. Li, J. Zhu, X. Zhang and R. Yu, *Carbon*, 2021, **171**, 646-657.

9 S. Gao, G. S. Wang, L. Guo and S. H. Yu, *Small*, 2020, 1906668.

10 P. Miao, J. Cao, J. Kong, J. Li, T. Wang and K. J. Chen, *Nanoscale*, 2020, **12**, 13311-13315.

11 R. Wang, M. He, Y. Zhou, S. Nie, Y. Wang, W. Liu, Q. He, W. Wu, X. Bu and X. Yang, *Carbon*, 2020, **156**, 378-388.
